# Supplementary material for: METTL3-mediated m6A RNA methylation induces the differentiation of lung resident mesenchymal stem cells into myofibroblasts via the miR-21/PTEN pathway
Source: PubMed Central journal article supplement (PMC10683095; doi:10.1186/s12931-023-02606-z), 2023-11-28

**A**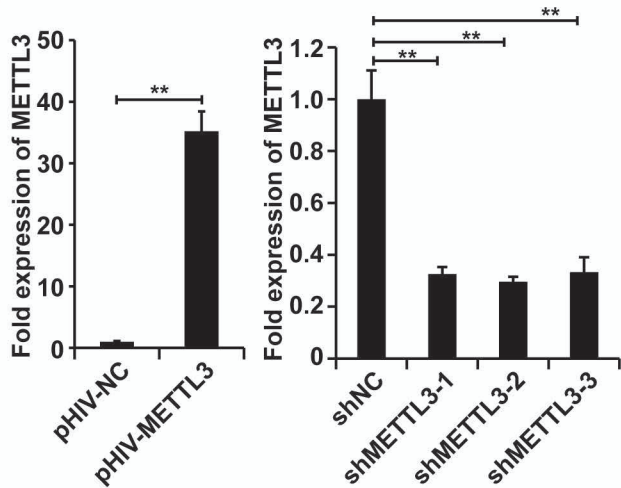**B**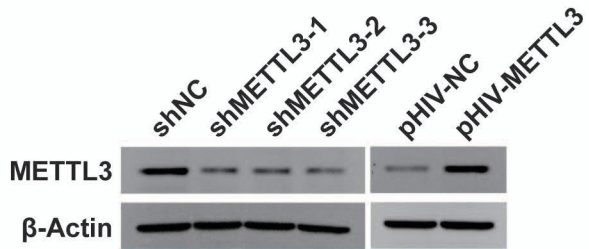

**A**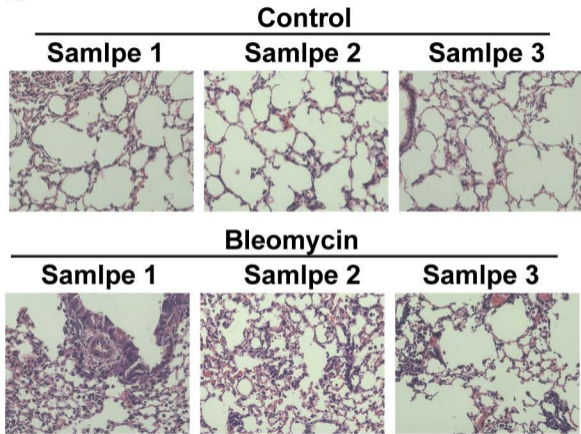**B**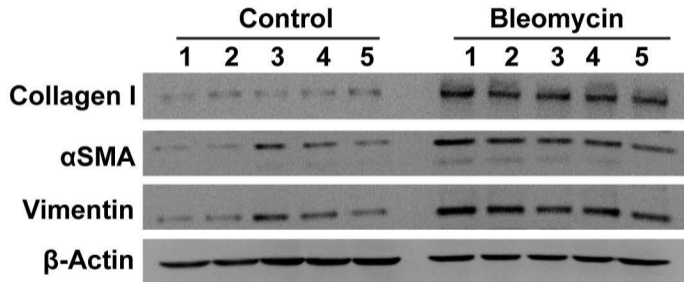



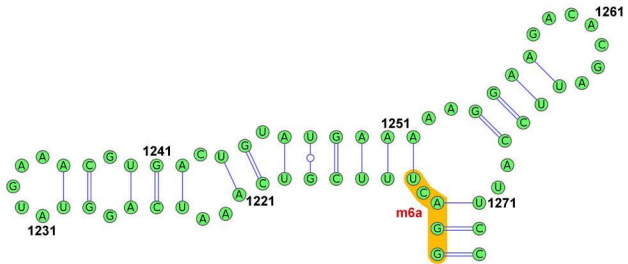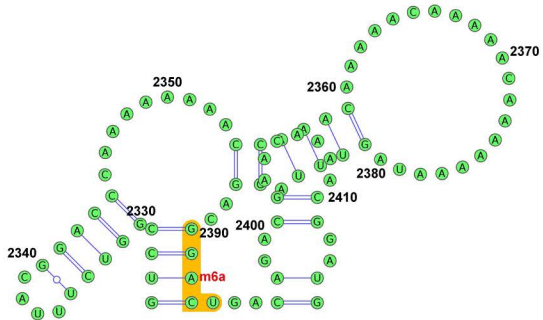

Supplement: 12931_2023_2606_MOESM1_ESM.pdf [file 12931_2023_2606_MOESM1_ESM.pdf]
